# Supplementary material for: How Small Molecules Affect the Thermo-Oxidative Aging Mechanism of Polypropylene: A Reactive Molecular Dynamics Study
Source: MDPI journal article supplement (doi:10.3390/polym13081243), 2021-04-12
Supplement: s1 [file s1]

## Supplementary Information

# How small molecules affect the thermo-oxidative aging mechanism of polypropylene: A reactive molecular dynamics study

Fan Zhang<sup>1</sup>, Yufei Cao<sup>1</sup>, Xuan Liu<sup>1</sup>, Huan Xu<sup>1</sup>, Diannan Lu<sup>1,\*</sup> and Rui Yang<sup>1,\*</sup>

<sup>1</sup> Department of Chemical Engineering, Tsinghua University, Beijing 100084, China

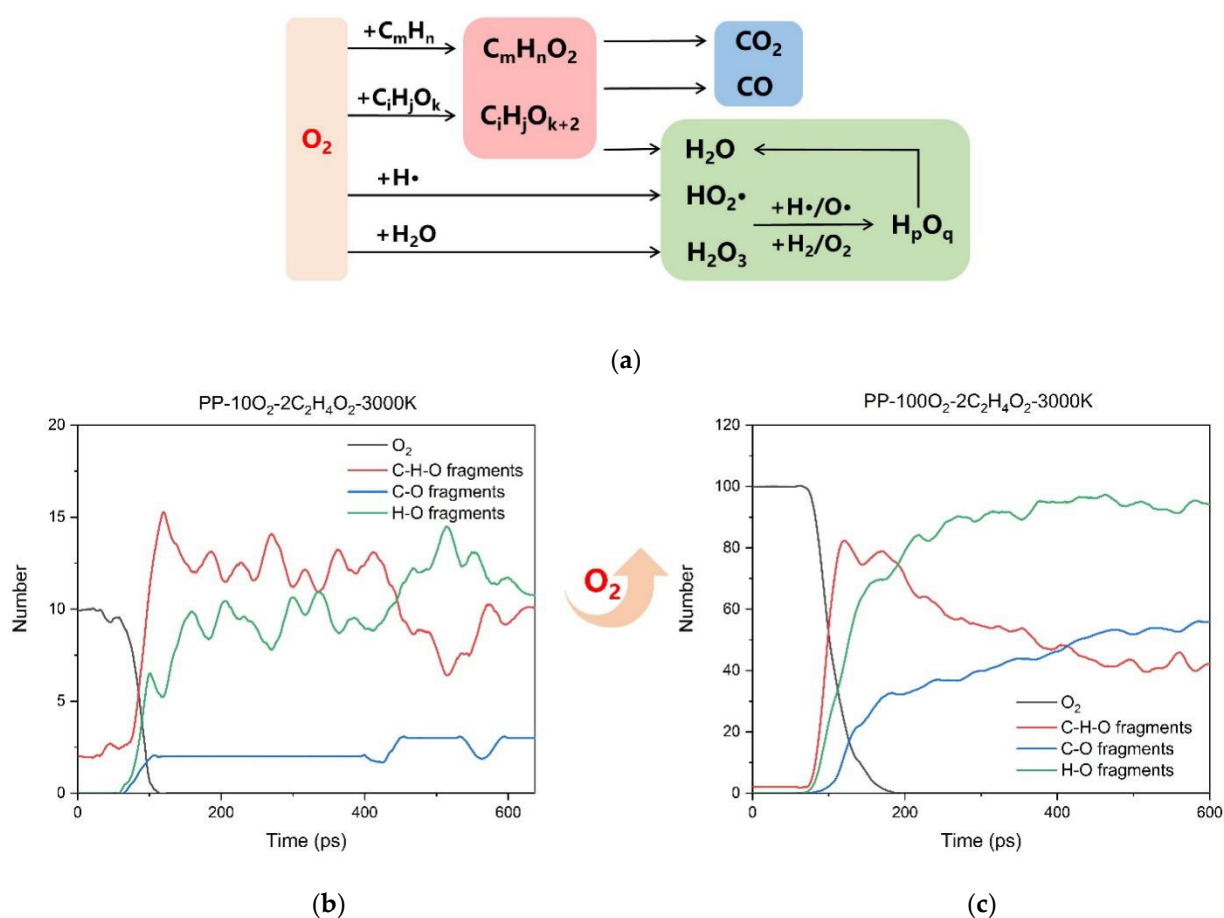

**Figure S1.** (a) Consumption ways of  $O_2$  at PP aging system; Distribution of oxygen-containing fragments at: (b) PP-10 $O_2$ -2 $C_2H_4O_2$ -3000 K (c) PP-100 $O_2$ -2 $C_2H_4O_2$ -3000 K

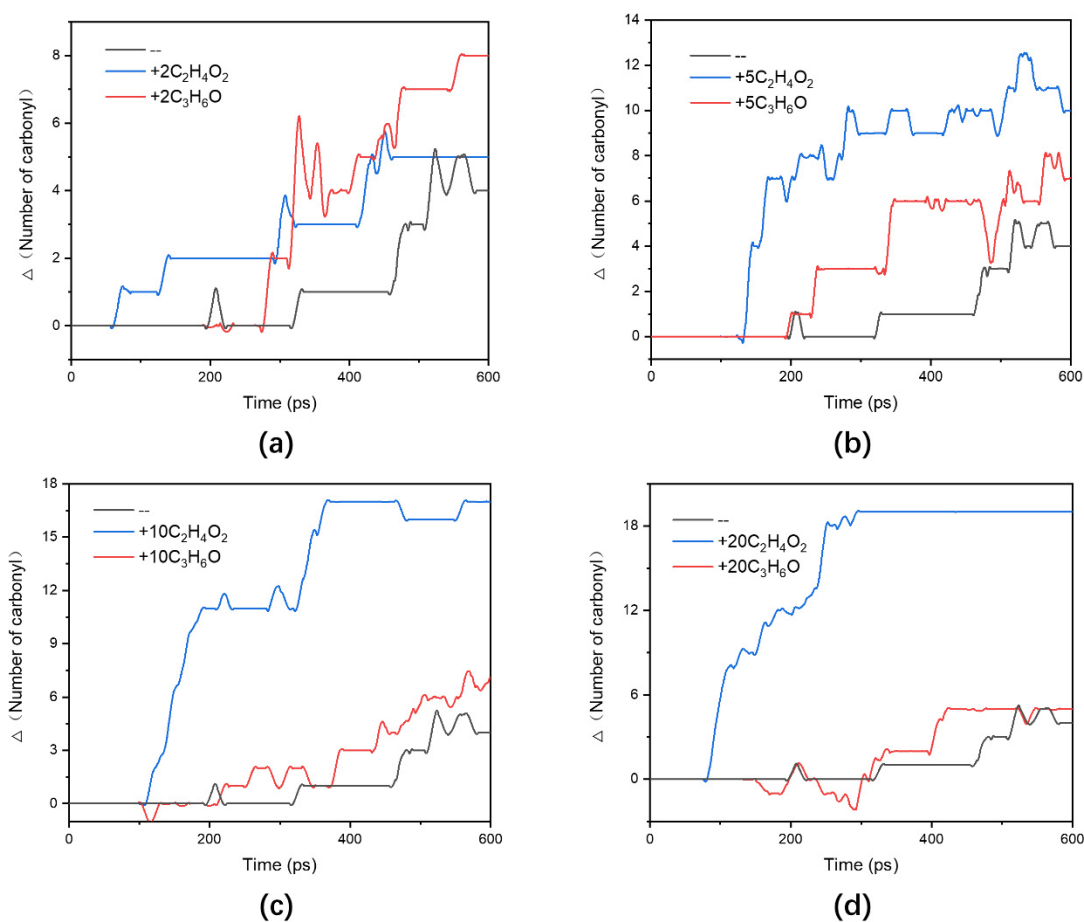

**Figure S2.** Evolution of the change of carbonyl number with time when the number of acetic acid / acetone added to the model was (a)2; (b)5; (c)10; (d)20.

### pathway A

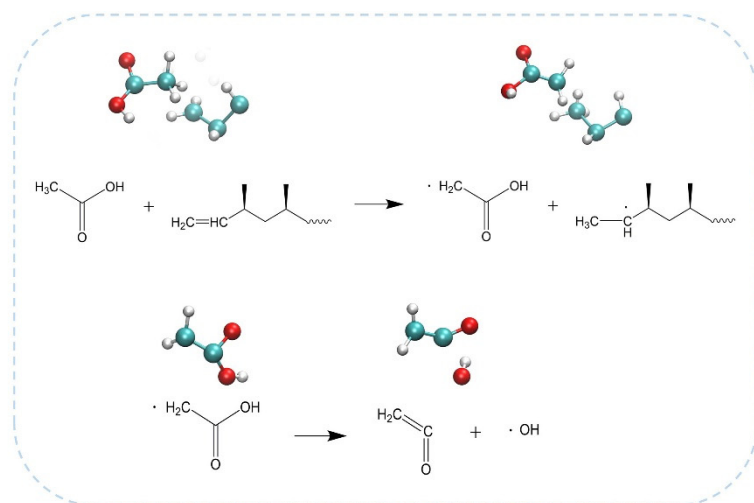

### pathway B

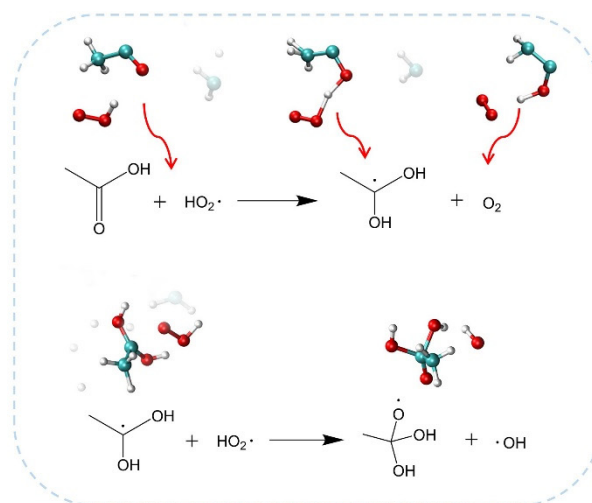

**Figure S3.** Other reaction paths for acetic acid

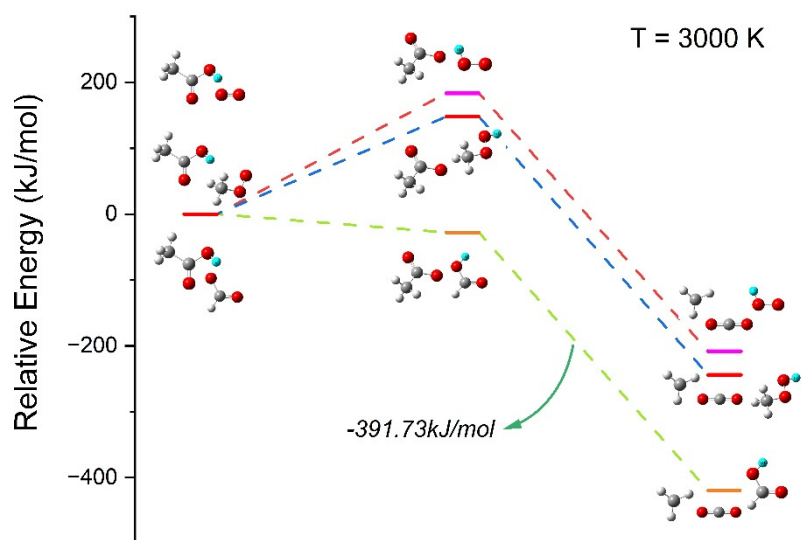

**Figure S4.** Gibbs free energy change for typical acetic acid reactions

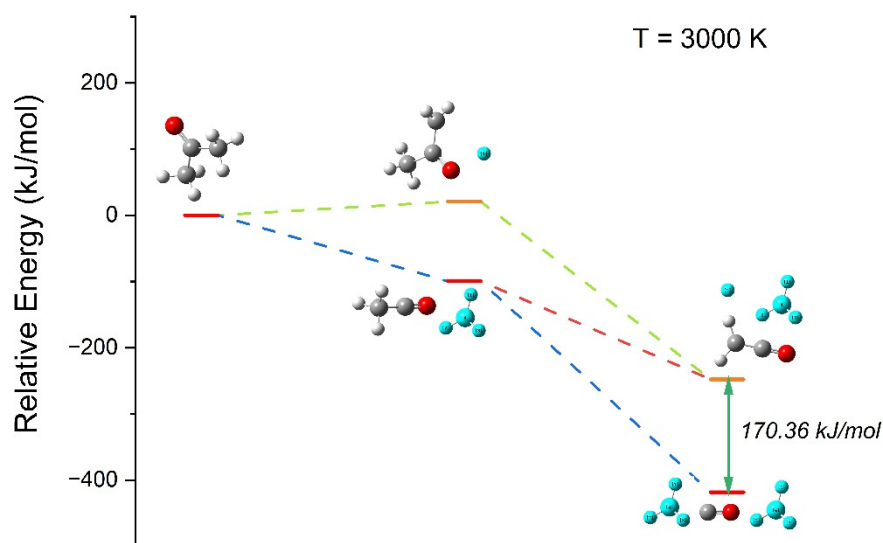

**Figure S5.** Gibbs free energy change for typical acetone reactions

**Table S1.** Proportion of the final products

| T/K  | C1    | C2    | C3    | C4   | C5   | C6   | C7   | C8   | C9   | C10+ | Not C | Total |
|------|-------|-------|-------|------|------|------|------|------|------|------|-------|-------|
| 2000 | 17.9% | 6.9%  | 46.1% | 5.9% | 4.9% | 4.9% | 2.0% | 1.0% | 0    | 5.9% | 4.9%  | 102   |
| 2500 | 28.8% | 26.1% | 17.0% | 5.9% | 3.3% | 3.3% | 1.3% | 0    | 0    | 2.6% | 11.8% | 153   |
| 3000 | 30.2% | 29.0% | 8.3%  | 5.3% | 2.4% | 0.6% | 0.6% | 0.6% | 0.6% | 3.0% | 19.5% | 169   |

**Table S2.** The formation method of CO and H<sub>2</sub>O in the system with 100 O<sub>2</sub>

| Product          | Generation ways                                              | The proportion of generation way | Reactions                                                                                                          |
|------------------|--------------------------------------------------------------|----------------------------------|--------------------------------------------------------------------------------------------------------------------|
| CO               | CO breaks away from C-H-O fragments <sup>1</sup> (C≥2)       | 60.5%                            | C <sub>4</sub> H <sub>3</sub> O · → CO + C <sub>3</sub> H <sub>3</sub> ·                                           |
|                  | H atom breaks away from CHO ·                                | 26.3%                            | CHO · → CO + H ·                                                                                                   |
|                  | C-H-O fragments(C=1) break down into CO and H <sub>m</sub> O | 13.2%                            | CHO · + H <sub>2</sub> O → CO + H <sub>3</sub> O ·                                                                 |
| H <sub>2</sub> O | H <sub>2</sub> O breaks away from C-H-O fragments            | 74.4%                            | C <sub>3</sub> H <sub>7</sub> O · → H <sub>2</sub> O + C <sub>3</sub> H <sub>5</sub> ·                             |
|                  | H atom breaks away from H <sub>2</sub> O <sub>2</sub>        | 9.3%                             | H <sub>2</sub> O <sub>2</sub> + C <sub>2</sub> H <sub>2</sub> → H <sub>2</sub> O + C <sub>2</sub> H <sub>2</sub> O |
|                  | Other H <sub>m</sub> O <sub>n</sub> fragments decompose      | 16.3%                            | H <sub>2</sub> O <sub>3</sub> → H <sub>2</sub> O + O <sub>2</sub>                                                  |

<sup>1</sup> C-H-O fragments: Fragments containing the elements carbon, hydrogen, and oxygen

**Table S3.** Calculation results of ΔG at different temperatures for the generation reactions of H<sub>2</sub>, CH<sub>4</sub> and C<sub>2</sub>H<sub>4</sub>

| Reaction                                                                                          | ΔG (kJ/mol) |          |         |         |         |         |
|---------------------------------------------------------------------------------------------------|-------------|----------|---------|---------|---------|---------|
|                                                                                                   | 298.15 K    | 383.15 K | 1600 K  | 2000 K  | 2400 K  | 3000 K  |
| C <sub>4</sub> H <sub>9</sub> · → H <sub>2</sub> + C <sub>4</sub> H <sub>7</sub> ·                | 166.76      | 141.30   | 2.15    | -42.82  | -86.99  | -151.86 |
| C <sub>4</sub> H <sub>9</sub> · → CH <sub>4</sub> + C <sub>3</sub> H <sub>5</sub> ·               | 90.36       | 80.03    | -89.60  | -130.38 | -168.66 | -194.15 |
| C <sub>4</sub> H <sub>9</sub> · → C <sub>2</sub> H <sub>4</sub> + C <sub>2</sub> H <sub>5</sub> · | 53.31       | 39.29    | -152.59 | -212.01 | -270.13 | -355.31 |

**Table S4.** Calculation results of ΔG at different temperatures for the typical reactions of acetic acid

| Reaction                                                                                                         | ΔG (kJ/mol) |          |         |
|------------------------------------------------------------------------------------------------------------------|-------------|----------|---------|
|                                                                                                                  | 298.15 K    | 383.15 K | 3000 K  |
| CH <sub>3</sub> COOH + O <sub>2</sub> → CH <sub>3</sub> COO · + HO <sub>2</sub> ·                                | 268.18      | 265.44   | 183.48  |
| CH <sub>3</sub> COOH + CHO <sub>2</sub> · → CH <sub>3</sub> COO · + CH <sub>2</sub> O <sub>2</sub>               | -14.66      | -15.12   | -27.90  |
| CH <sub>3</sub> COOH + CH <sub>3</sub> O <sub>2</sub> · → CH <sub>3</sub> COO · + CH <sub>4</sub> O <sub>2</sub> | 124.41      | 124.44   | 147.77  |
| CH <sub>3</sub> COO · → CO <sub>2</sub> + CH <sub>3</sub> ·                                                      | -101.61     | -111.26  | -391.73 |

**Table S5.** Calculation results of ΔG at different temperatures for the typical reactions of acetone

| Reaction                                                                      | ΔG (kJ/mol) |          |         |
|-------------------------------------------------------------------------------|-------------|----------|---------|
|                                                                               | 298.15 K    | 383.15 K | 3000 K  |
| CH <sub>3</sub> COCH <sub>3</sub> → CH <sub>3</sub> CO · + CH <sub>3</sub> ·  | 311.21      | 297.77   | -99.44  |
| CH <sub>3</sub> CO · → CH <sub>2</sub> CO + H ·                               | 143.08      | 134.99   | 148.47  |
| CH <sub>3</sub> CO · → CO + CH <sub>3</sub> ·                                 | 10.11       | -0.53    | -318.83 |
| CH <sub>3</sub> COCH <sub>3</sub> → CH <sub>3</sub> COCH <sub>2</sub> · + H · | 366.30      | 356.69   | 20.55   |
| CH <sub>3</sub> COCH <sub>2</sub> · → CH <sub>2</sub> CO + CH <sub>3</sub> ·  | 87.99       | 76.06    | 268.45  |
